# Supplementary material for: Nano-Metal Organic Framework for Enhanced Mechanical, Flame Retardant and Ultraviolet-Blue Light Shielding Properties of Transparent Cellulose-Based Bioplastics
Source: MDPI journal article supplement (doi:10.3390/polym13152433), 2021-07-23
Supplement: s1 [file s1]

Article

# Nano-Metal Organic Framework for Enhanced Mechanical, Flame Retardant and Ultraviolet-Blue Light Shielding Properties of Transparent Cellulose-Based Bioplastics

Lijian Sun, Limei Li, Xianhui An and Xueren Qian\*

Key Laboratory of Bio-Based Material Science & Technology Ministry of Education, Northeast Forestry University, Harbin 150040, China; lantian0308@nefu.edu.cn (L.S.); limeili937@foxmail.com (L.L.); anxianh509@163.com (X.A.)

\* Correspondence: qianxueren@nedu.edu.cn; Tel.: +86-13304642918

**Citation:** Sun, L.; Li, L.; An, X.; Qian, X. Nano-Metal Organic Framework for Enhanced Mechanical, Flame Retardant and Ultraviolet-Blue Light Shielding Properties of Transparent Cellulose-Based Bioplastics. *Polymers* **2021**, *13*, 2433. <https://doi.org/10.3390/polym13152433>

Academic Editor: Sergio Torres-Giner

Received: 29 May 2021

Accepted: 20 July 2021

Published: 23 July 2021

**Publisher's Note:** MDPI stays neutral with regard to jurisdictional claims in published maps and institutional affiliations.

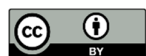

**Copyright:** © 2021 by the authors. Licensee MDPI, Basel, Switzerland. This article is an open access article distributed under the terms and conditions of the Creative Commons Attribution (CC BY) license (<http://creativecommons.org/licenses/by/4.0/>).

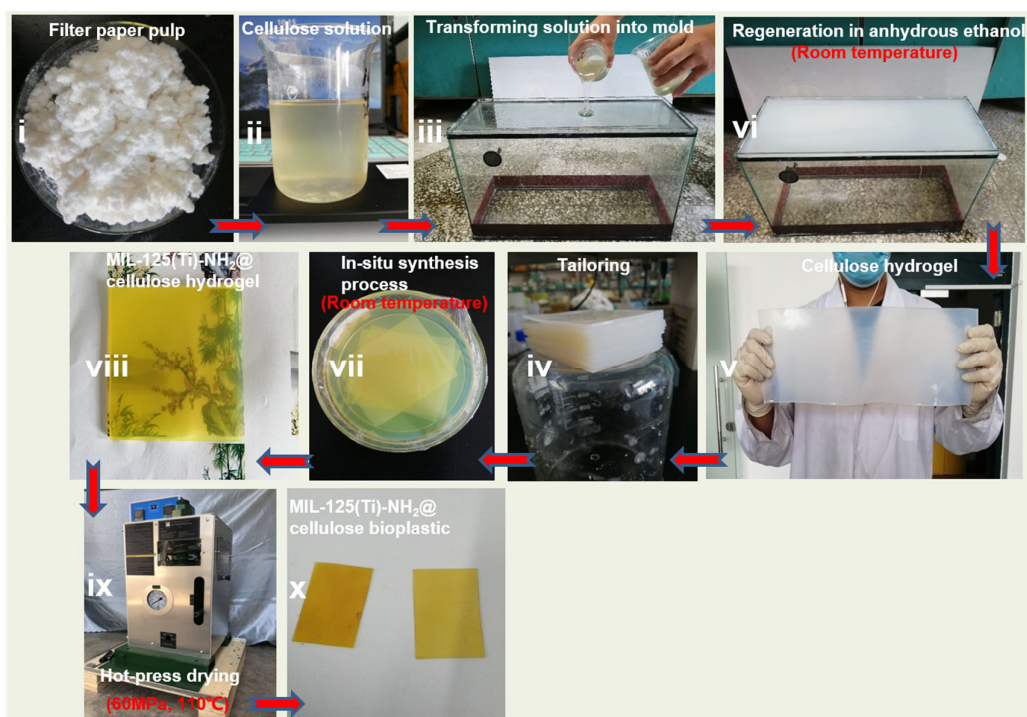

**Figure S1.** Fabrication of MIL-125(Ti)-NH<sub>2</sub>@cellulose bioplastic (MNP@CBP) from filter paper pulp.

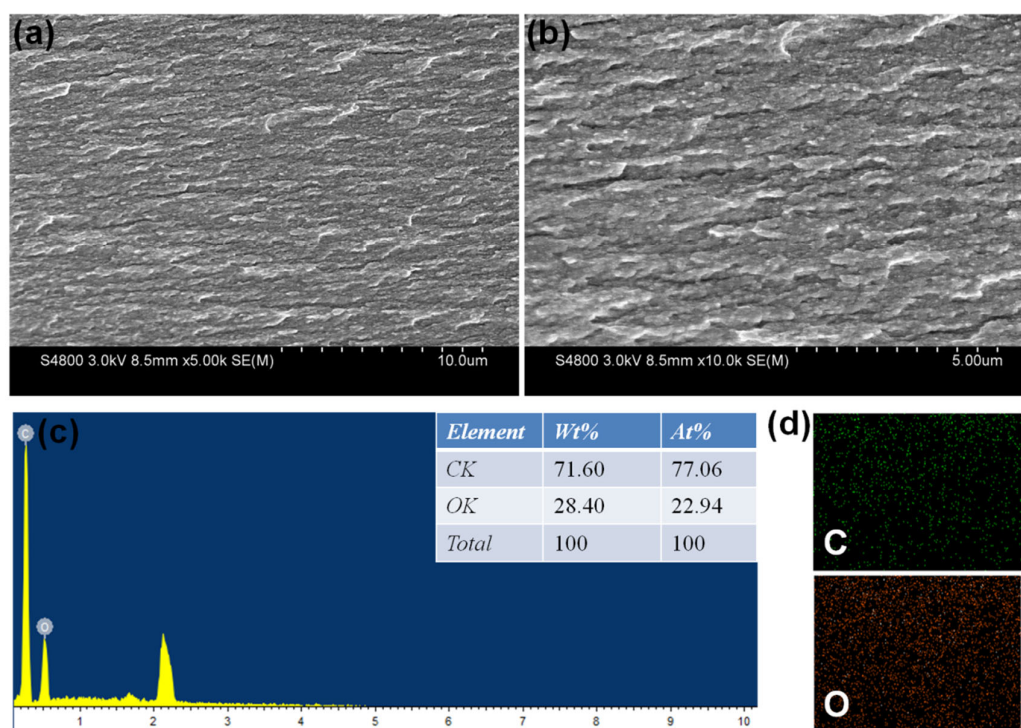

**Figure S2.** (a, b) Cross-sectional SEM images of CBP; (c) EDS spectrum of CBP; (d) Elemental mapping images of CBP for carbon and oxygen.

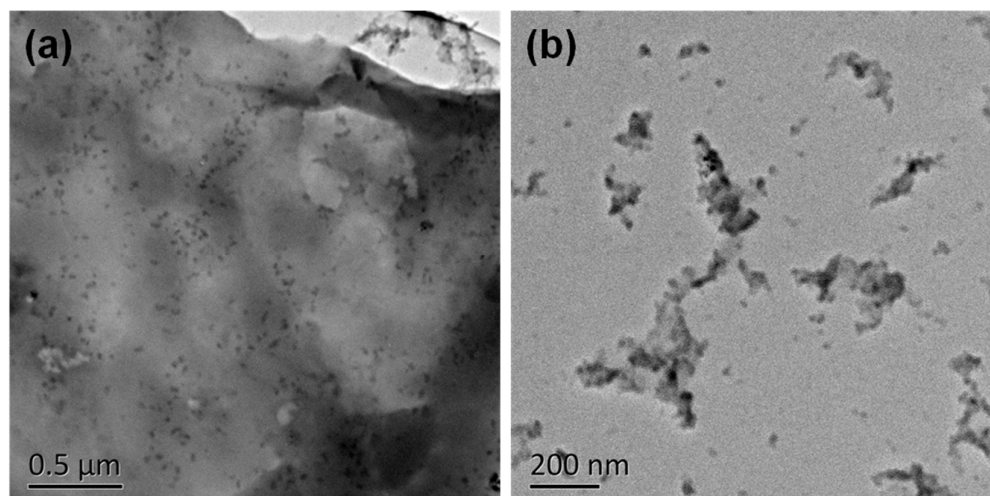

**Figure S3.** TEM images of MNP@CBP5.

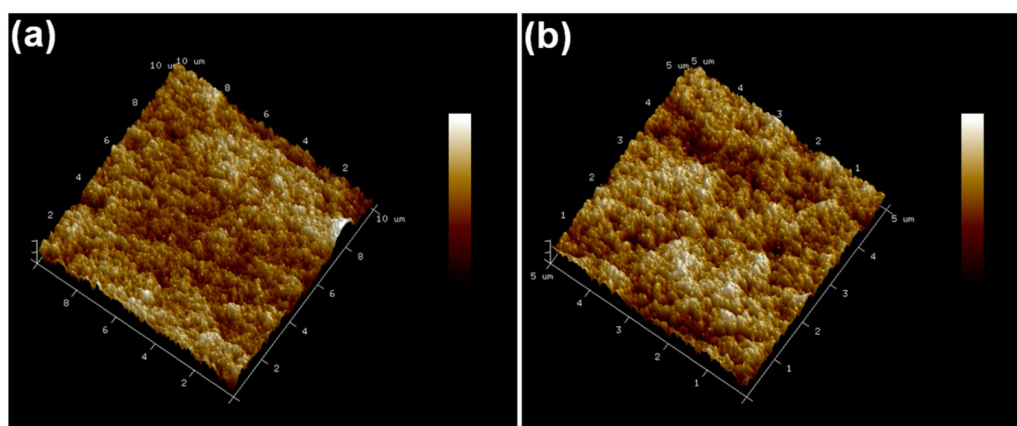

Figure S4. AFM images of pure CBP (a) and MNP@CBP5 (b).

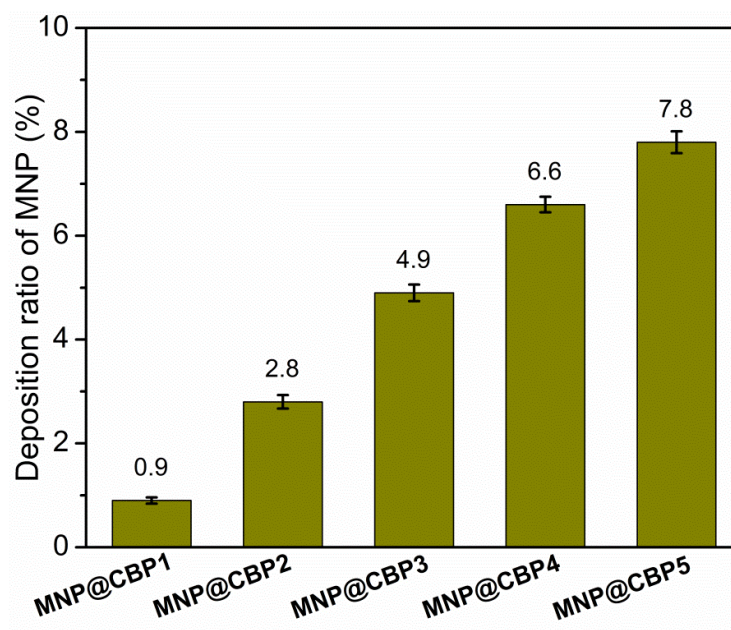

Figure S5. Deposition ratio of MNP into MNP@CBPs.

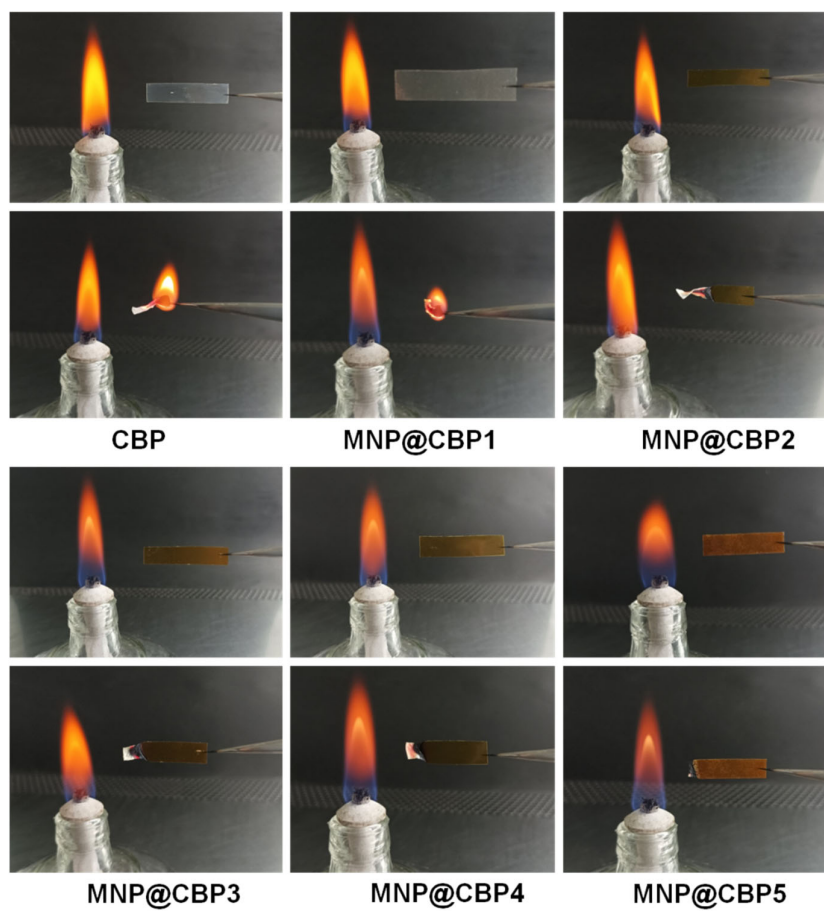

Figure S6. Photos of the samples before and after burning.

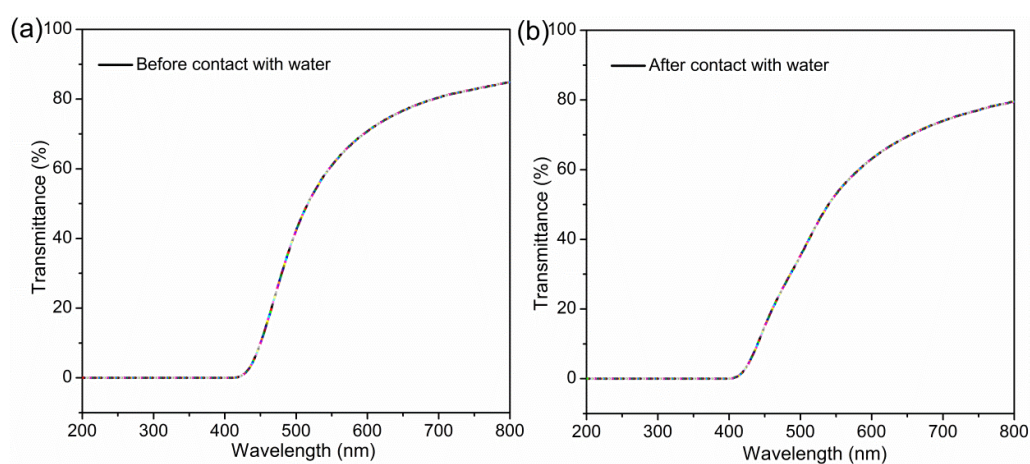

Figure S7. UV transmittance curves of MNP@CBP3 after 12 hours of contact with water.

**Table S1.** Reagents dosage, reaction time and temperature used for sample preparation.

| Sample   | TiOiPr (mmol) | NH <sub>2</sub> -BDC (mmol) | Time (h) | Temperature (°C) |
|----------|---------------|-----------------------------|----------|------------------|
| MNP@CBP1 | 0.335         | 0.55                        | 48       | 25               |
| MNP@CBP2 | 0.67          | 1.1                         | 48       | 25               |
| MNP@CBP3 | 1.34          | 2.2                         | 48       | 25               |
| MNP@CBP4 | 2.01          | 3.3                         | 48       | 25               |
| MNP@CBP5 | 2.68          | 4.4                         | 48       | 25               |
